# Supplementary material for: Single-Cell RNA-seq Analysis Reveals Dysregulated Cell-Cell Interactions in a Tumor Microenvironment Related to HCC Development
Source: Hindawi journal article supplement (doi:10.1155/2022/4971621), 2022-05-18
Supplement: f1 [file 4971621.f1.pdf]

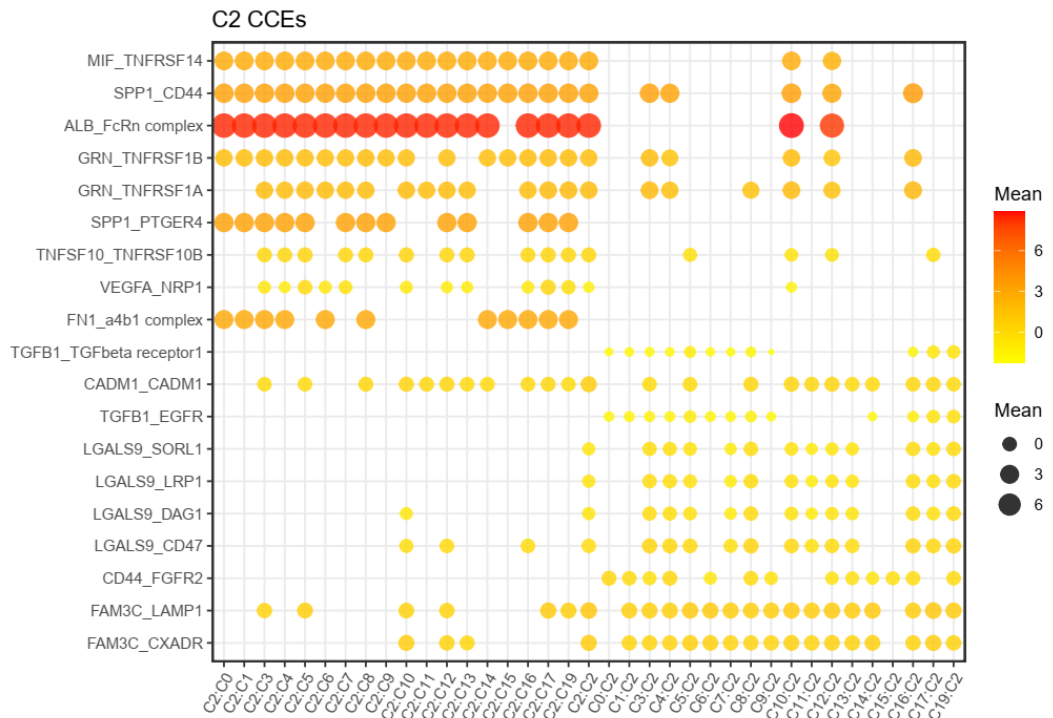

**Figure S1.** The CCEs of cell cluster C2 interacted with other cell clusters.

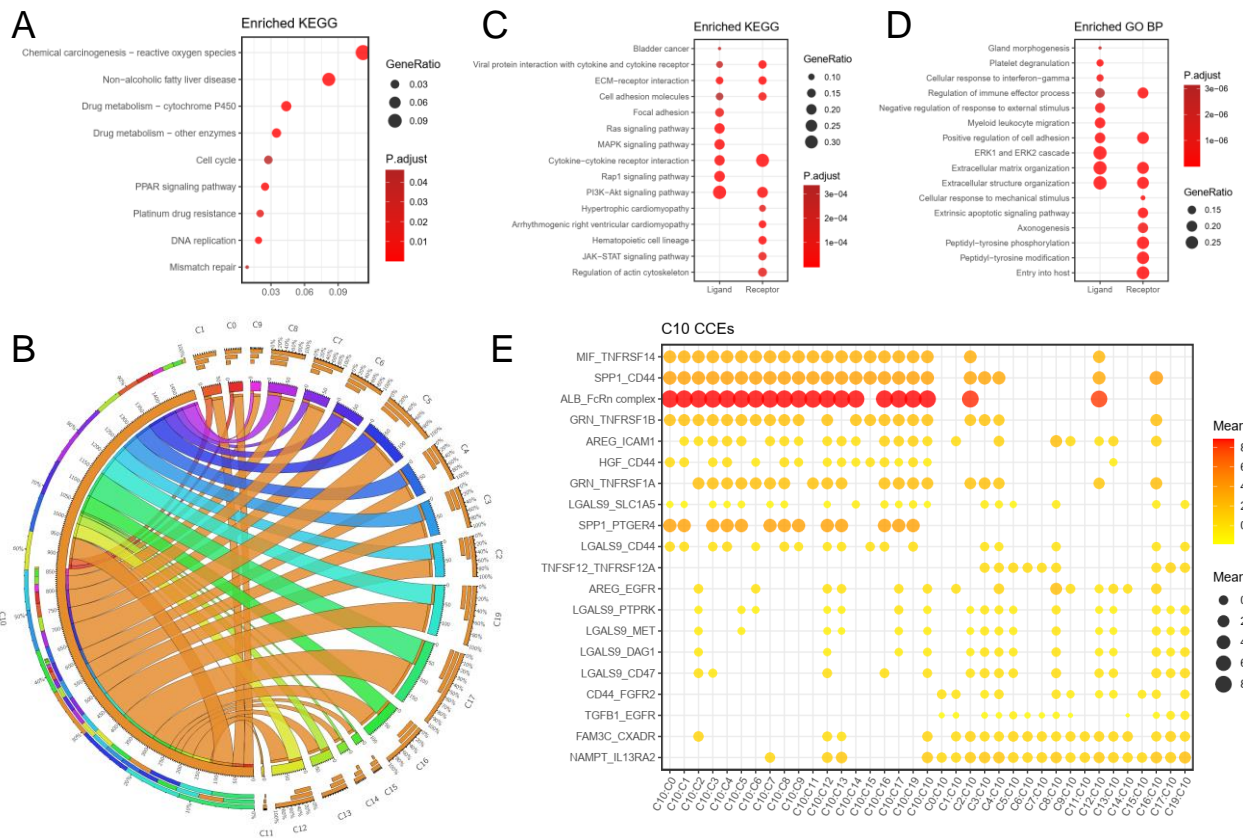

**Figure S2.** Cell-cell interaction events (CCEs) between hepatocyte (cluster C10) and other cell clusters in the microenvironment.

- Significantly enriched KEGG pathways of the markers of cluster C10;
- The circos plot for CCE counts from hepatocyte cluster to other cell clusters in HCC;
- Significantly enriched KEGG pathways of the ligand and receptor genes of cluster C10 in HCC;
- Significantly enriched GO BP terms of the ligand and receptor genes of cluster C10 in HCC;
- The CCEs of cell cluster C10 interacted with other cell clusters.

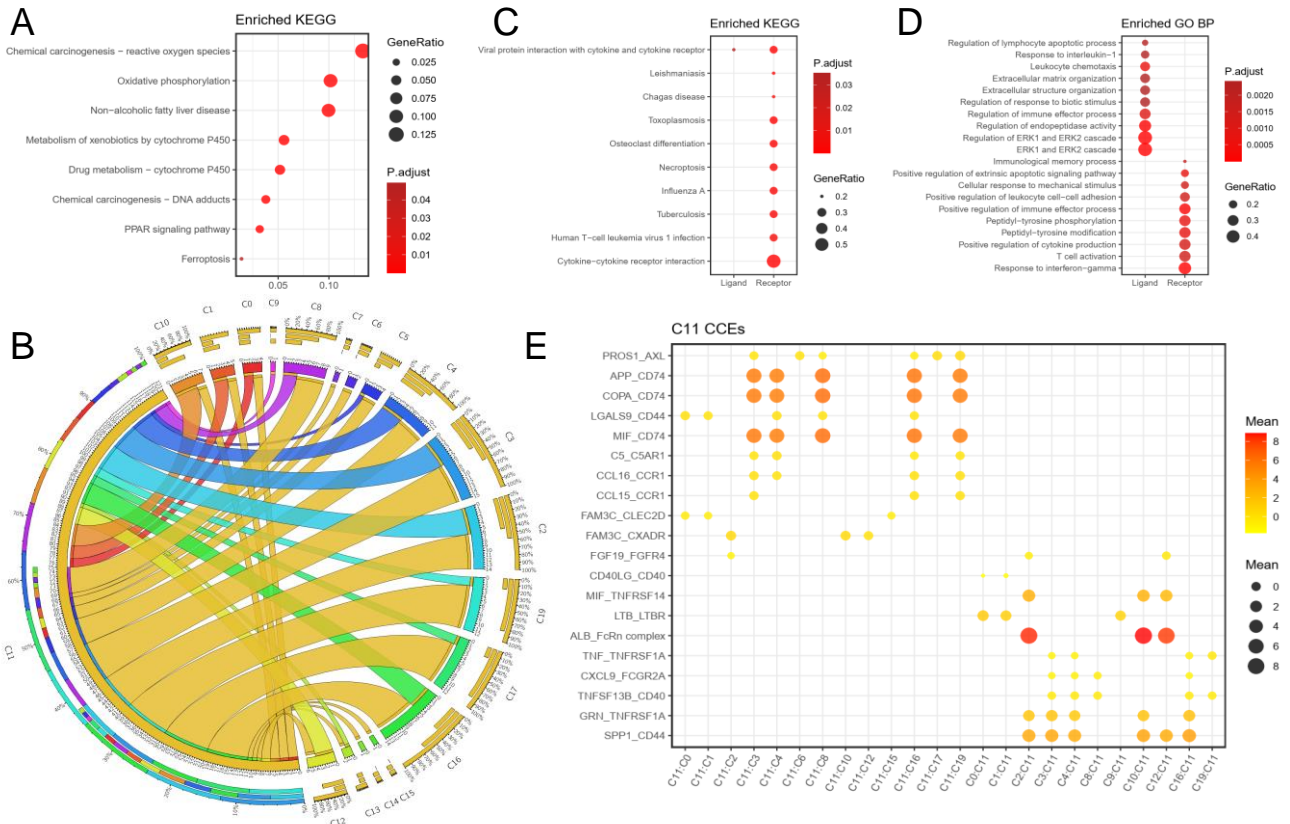

**Figure S3.** Cell-cell interaction events (CCEs) between hepatocyte (cluster C11) and other cell clusters in the microenvironment.

- A) Significantly enriched KEGG pathways of the markers of cluster C11;
- B) The circos plot for CCE counts from hepatocyte cluster to other cell clusters in HCC;
- C) Significantly enriched KEGG pathways of the ligand and receptor genes of cluster C11 in HCC;
- D) Significantly enriched GO BP terms of the ligand and receptor genes of cluster C11 in HCC;
- E) The CCEs of cell cluster C11 interacted with other cell clusters.

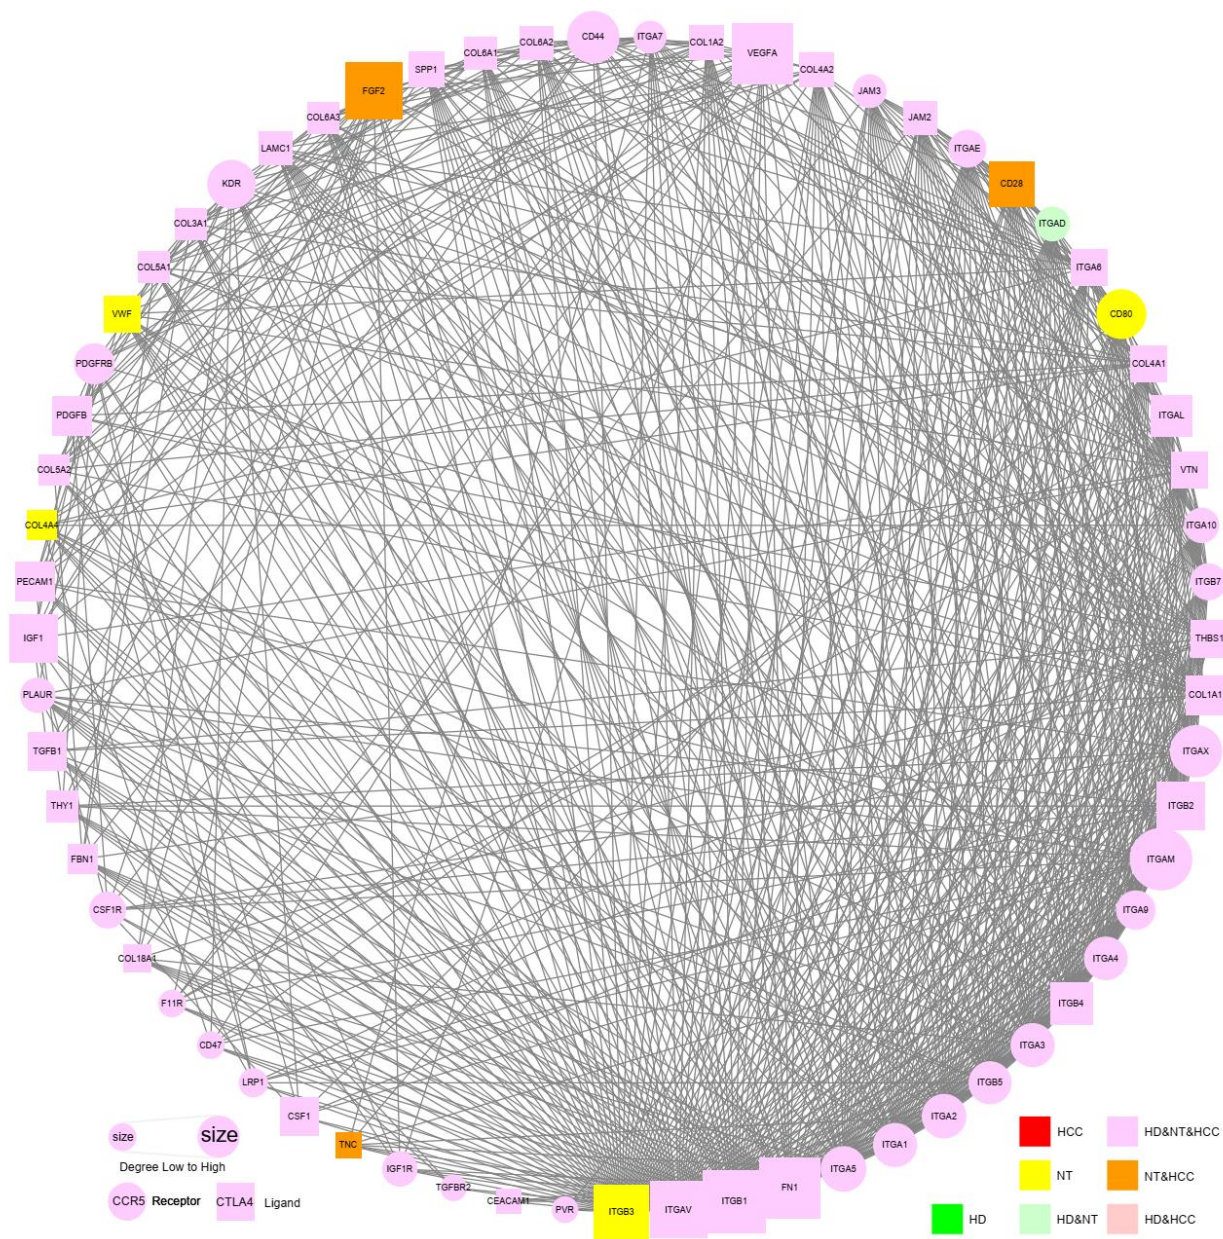

**Figure S4.** The protein-protein interaction (PPI) network constructed with NT specific CCE gene ITGB3 and the related CCE genes in NT.

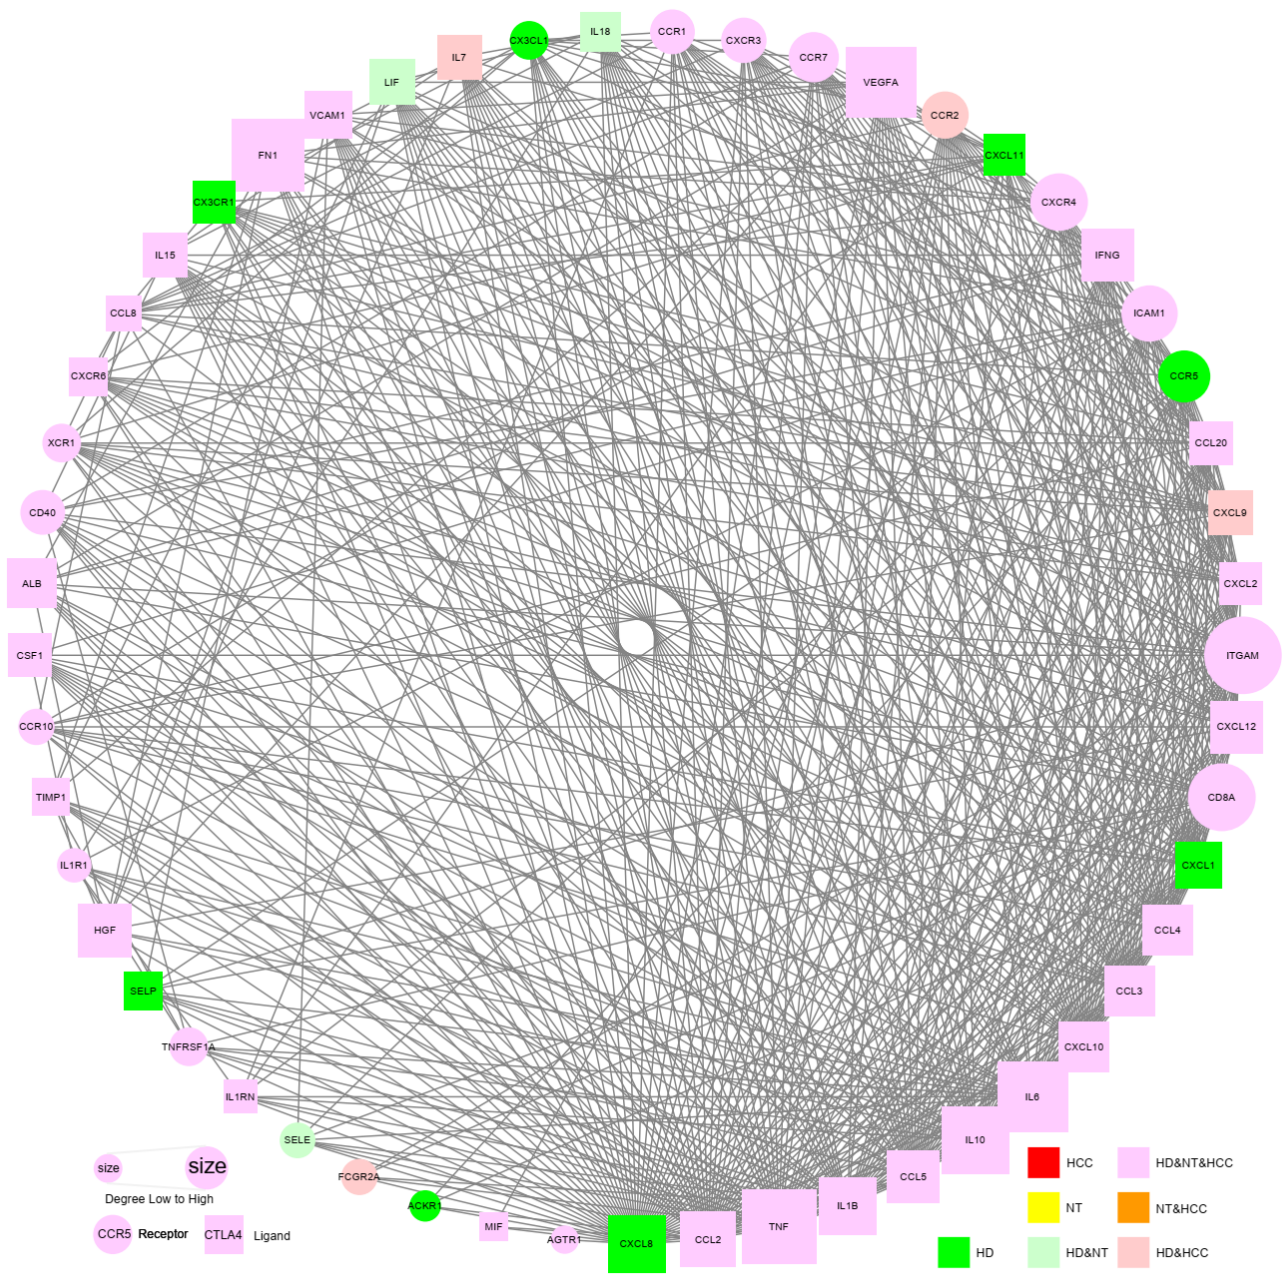

**Figure S5.** The protein-protein interaction (PPI) network constructed with HD specific CCE gene CXCL8 and the related CCE genes in HD.
